# Supplementary material for: Systemic immunomodulatory treatments for atopic dermatitis: protocol for a systematic review with network meta-analysis
Source: PubMed Central journal article supplement — BMJ Open. 2018 Aug 29;8(8):e023061. doi: 10.1136/bmjopen-2018-023061 (PMC6119412; doi:10.1136/bmjopen-2018-023061), 2018-08-29
Supplement: bmjopen-2018-023061.draft_revisions.pdf [file bmjopen-2018-023061.draft_revisions.pdf]

# BMJ Open

BMJ Open is committed to open peer review. As part of this commitment we make the peer review history of every article we publish publicly available.

When an article is published we post the peer reviewers' comments and the authors' responses online. We also post the versions of the paper that were used during peer review. These are the versions that the peer review comments apply to.

The versions of the paper that follow are the versions that were submitted during the peer review process. They are not the versions of record or the final published versions. They should not be cited or distributed as the published version of this manuscript.

BMJ Open is an open access journal and the full, final, typeset and author-corrected version of record of the manuscript is available on our site with no access controls, subscription charges or pay-per-view fees (<http://bmjopen.bmj.com>).

If you have any questions on BMJ Open's open peer review process please email [info.bmjopen@bmj.com](mailto:info.bmjopen@bmj.com)

# BMJ Open

## Systemic immunomodulatory treatments for atopic dermatitis: protocol for a systematic review with network meta-analysis

|                               |                                                                                                                                                                                                                                                                                                                                                                                                                                                                                                                                                                                                                                                                       |
|-------------------------------|-----------------------------------------------------------------------------------------------------------------------------------------------------------------------------------------------------------------------------------------------------------------------------------------------------------------------------------------------------------------------------------------------------------------------------------------------------------------------------------------------------------------------------------------------------------------------------------------------------------------------------------------------------------------------|
| Journal:                      | <i>BMJ Open</i>                                                                                                                                                                                                                                                                                                                                                                                                                                                                                                                                                                                                                                                       |
| Manuscript ID                 | bmjopen-2018-023061                                                                                                                                                                                                                                                                                                                                                                                                                                                                                                                                                                                                                                                   |
| Article Type:                 | Protocol                                                                                                                                                                                                                                                                                                                                                                                                                                                                                                                                                                                                                                                              |
| Date Submitted by the Author: | 20-Mar-2018                                                                                                                                                                                                                                                                                                                                                                                                                                                                                                                                                                                                                                                           |
| Complete List of Authors:     | Drucker, Aaron; Women's College Hospital, Medicine<br>Ellis, Alexandra; Brown University School of Public Health<br>Jabbar-Lopez, Zarif; Guy's and St Thomas' NHS Foundation Trust, St John's Institute of Dermatology<br>Yiu, Zenas; Salford Royal NHS Foundation Trust<br>Arents, Bernd; Patients association for patients with AD (VMCE),<br>Burton, Tim<br>Spuls, Phyllis<br>Küster, Denise; Technische Universität Dresden Medizinische Fakultät Carl Gustav Carus, Center for Evidence-Based Healthcare<br>Schmitt, Jochen; Medical Faculty Carl Gustav Carus, Technical University Dresden, Department of Dermatology<br>Flohr, Carsten; King's College London |
| Keywords:                     | DERMATOLOGY, Eczema < DERMATOLOGY, Adult dermatology < DERMATOLOGY, Paediatric dermatology < DERMATOLOGY                                                                                                                                                                                                                                                                                                                                                                                                                                                                                                                                                              |
|                               |                                                                                                                                                                                                                                                                                                                                                                                                                                                                                                                                                                                                                                                                       |

SCHOLARONE™  
Manuscripts

1  
2  
3 **Systemic immunomodulatory treatments for atopic dermatitis: protocol for a systematic**  
4 **review with network meta-analysis**  
5

6 Aaron M Drucker<sup>1,2</sup>, Alexandra Ellis<sup>3</sup>, Zarif Jabbar-Lopez<sup>4</sup>, Zenas Z N Yiu<sup>5</sup>, Bernd WM  
7 Arents<sup>6</sup>, Tim Burton<sup>7</sup>, Phyllis I Spuls<sup>8</sup>, Denise Küster<sup>9</sup>, Jochen Schmitt<sup>9</sup>, Carsten Flohr<sup>4</sup>  
8  
9

- 10 1. Division of Dermatology, Department of Medicine, University of Toronto, Toronto, Canada  
11 2. Department of Medicine and Women's College Research Institute, Women's College  
12 Hospital, Toronto, Canada  
13 3. Brown University, Providence, Rhode Island, USA  
14 4. St John's Institute of Dermatology, Guy's and St Thomas' NHS Foundation Trust, London,  
15 UK  
16 5. Dermatology Centre, The University of Manchester, Salford Royal NHS Foundation Trust,  
17 Manchester, UK  
18 6. Dutch Association for People with Atopic Dermatitis (VMCE), Nijkerk, The Netherlands  
19 7. Patient Representative (independent), Nottingham, UK  
20 8. Department of Dermatology, Academic Medical Centre, University of Amsterdam,  
21 Amsterdam, The Netherlands  
22 9. Center for Evidence-Based Healthcare, Faculty of Medicine Carl Gustav Carus, Technische  
23 Universität (TU) Dresden, Germany  
24  
25  
26  
27  
28

29 **Corresponding author**

30 Aaron Drucker, MD, ScM, FRCPC  
31 Room 6401, Women's College Hospital  
32 76 Grenville Street  
33 Toronto, Ontario, Canada  
34 M5S 1B2  
35 Email: [aaron.drucker@wchospital.ca](mailto:aaron.drucker@wchospital.ca)  
36 Phone: 416-323-7546  
37  
38

39 **Word count:** 2,264  
40  
41  
42  
43  
44  
45  
46  
47  
48  
49  
50  
51  
52  
53  
54  
55  
56  
57  
58  
59  
60

## ABSTRACT

**Introduction:** There are numerous new systemic treatments for atopic dermatitis in various stages of development and most are being compared with placebo rather than active comparators.

In order to understand the relative efficacy and safety of existing and new treatments for atopic dermatitis, robust mixed comparisons (i.e., direct and indirect) would be beneficial. To address this gap, this protocol describes methods for a systematic review and network meta-analysis of systemic treatments for atopic dermatitis.

**Methods and analysis:** We will update the search of a previous systematic review, including searches of the Cochrane Central Register of Controlled Trials, MEDLINE, Embase, Latin American and Caribbean Health Science Information database and the Global Resource of Eczema Trials database in addition to clinical trial protocol registries. Title, abstract and full paper screening as well as data extraction will be conducted in duplicate by independent researchers. Primary outcomes include efficacy with regards to clinician-reported signs and patient-reported symptoms and safety with regards to withdrawal from treatment due to adverse events and the occurrence of serious adverse events. Secondary outcomes will include change in quality of life and itch severity. Where possible and appropriate, network meta-analysis will be performed for each outcome using a random-effects model within a Bayesian framework. If appropriate, the review will be transitioned to a living review with continuous updating of the analysis.

**Ethics and dissemination:** Dissemination in a peer-reviewed scientific journal is planned.

**PROSPERO registration number:** CRD42018088112.

**Keywords:** Atopic dermatitis, network meta-analysis, protocol, biologics, therapy

## STRENGTHS AND LIMITATIONS OF THIS STUDY

- We will conduct a thorough literature search to identify all relevant trials on the efficacy and safety of systemic treatments for atopic dermatitis, building on a recent Cochrane review that did not incorporate quantitative synthesis.
- The efficacy outcomes of interest represent three important domains, namely change in clinician-reported signs of disease, patient-reported symptoms and patient-reported quality of life.
- Network meta-analysis, if appropriate, will allow comparison of treatments that have not been compared head-to-head.
- Diverse outcome measurement instruments used to assess the three outcome domains may limit our ability to pool results from different studies.
- The study team includes patients, clinicians and methodologists.

## INTRODUCTION

Atopic dermatitis (AD) is a chronically relapsing inflammatory skin condition. For most patients, AD is mild and can be managed effectively with over-the-counter emollients and prescription topical therapies including corticosteroids. It is estimated that 7% of children and 2-8% of adults with AD have severe disease.<sup>1 2</sup> For these patients, topical therapies may be unsuccessful or inadequate and treatment with photo- or systemic therapy may be warranted.<sup>3</sup>

For years, systemic therapeutic options were limited to traditional immunosuppressive medications such as cyclosporine, methotrexate, azathioprine, mycophenolate and corticosteroids.<sup>4</sup> More recently, targeted agents have been developed including dupilumab, the first biologic approved for the treatment of moderate-to-severe AD.<sup>5</sup> Many other biologic and small-molecule treatments are currently being tested in clinical trials.<sup>6</sup>

Determining the relative efficacy and safety of the older and newer systemic therapies for AD is challenging. Most randomized controlled trials (RCTs) do not use standardized outcome measures and head-to-head comparison are rare.<sup>4 5 7-13</sup> Therefore, in order for clinicians and patients to understand how established and upcoming therapies compare with regards to efficacy and safety, indirect comparisons must be made. The aim of our study is to conduct a systematic review and network meta-analysis (NMA) to determine the relative efficacy and safety of systemic treatments for AD (Table 1). To date, no NMA has been conducted comparing systemic treatments for AD.

## METHODS AND ANALYSIS

This protocol has been written according to the Preferred Reporting Items for Systematic review and Meta-Analysis Protocols (PRISMA-P) guidance<sup>14</sup> and has been registered on Prospero ([http://www.crd.york.ac.uk/PROSPERO/display\\_record.php?ID=CRD42018088112](http://www.crd.york.ac.uk/PROSPERO/display_record.php?ID=CRD42018088112)). The research team consists of AD patients, clinicians and methodologists, all of whom have contributed to the design of this study. The specific research objectives are summarized in Table 1.

### Eligibility criteria

All RCTs of immunomodulatory systemic therapies for moderate-to-severe AD will be included in this review, without age and sex restriction. Due to the absence of an established definition of moderate-to-severe AD, RCTs will be eligible when including subjects defined as: "patients with moderate-to-severe AD", "patients with non-adequately controlled AD despite the use of topical anti-inflammatory therapy" or patients with moderate-to-severe AD according to published severity criteria.<sup>15 16</sup> We will summarize the inclusion criteria used for each study. All other study types and disease states will be excluded, including studies on other forms of eczema/dermatitis such as chronic hand dermatitis.

RCTs that compare systemic immunomodulatory therapies for AD with any comparator, including placebo, are eligible. Systemic immunomodulatory therapies include cyclosporine, methotrexate, azathioprine, mycophenolate, corticosteroids interferon-gamma, intravenous immunoglobulin, dupilumab and other novel systemic agents. We will include studies with systemic immunomodulatory therapies as monotherapy or in combination with topical therapies.

1  
2  
3 Medications used at different dosages will be treated as separately in the primary network meta-  
4 analysis. Studies investigating other systemic therapies, such as Chinese herbal remedies,  
5  
6 antihistamines, leukotriene antagonists, oral calcineurin inhibitors, vaccinations, phototherapy or  
7  
8 antiviral/antibiotic agents will not be considered.  
9

10  
11  
12  
13  
14 In order to be included, RCTs must report sufficient data on at least one of the primary or  
15  
16 secondary outcomes listed in Table 1. Sufficient data include a point estimate and a measure of  
17  
18 variance (e.g., standard error, 95% confidence interval) for continuous outcomes and sample size  
19  
20 with number of patients experiencing an event for binary outcomes. We will examine these  
21  
22 endpoints for short-term ( $\leq 16$  weeks) and long term ( $> 16$  weeks) treatment.  
23  
24  
25  
26  
27

### 28 **Information sources and search strategy**

29  
30  
31 Our searches will update those of a Cochrane review without quantitative synthesis authored by  
32  
33 members of our research team.<sup>17</sup> Electronic searches will be performed in the following  
34  
35 databases: Cochrane Central Register of Controlled Trials (CENTRAL); MEDLINE via Ovid  
36  
37 (from 1946); Embase via Ovid (from 1974); Latin American and Caribbean Health Science  
38  
39 Information database (LILACS) (from 1982); the Global Resource of Eczema Trials (GREAT)  
40  
41 database. Our search strategies for these databases will be modeled on the Medline strategy  
42  
43 originally developed for the previous Cochrane systematic review.<sup>17</sup> Searches will also be  
44  
45 performed in the following trials registers: the ISRCTN registry ([www.isrctn.com](http://www.isrctn.com));  
46  
47 ClinicalTrials.gov ([www.ClinicalTrials.gov](http://www.ClinicalTrials.gov)); the Australian New Zealand Clinical Trials  
48  
49 Registry ([www.anzctr.org.au](http://www.anzctr.org.au)); the World Health Organization International Clinical Trials  
50  
51 Registry Platform (ICTRP); the EU Clinical Trials Register ([www.clinicaltrialsregister.eu](http://www.clinicaltrialsregister.eu)).  
52  
53  
54  
55  
56  
57  
58  
59  
60

1  
2  
3  
4  
5 We will hand search reference lists of relevant publications that are retrieved as full papers as  
6 well as relevant systematic reviews and literature reviews to identify other eligible studies.  
7  
8 Experts in the field will be contacted for additional published and unpublished studies.  
9  
10  
11  
12

13  
14 We will include data from published peer-reviewed journals, conference abstracts, trial registries  
15 and product monographs. Only studies published in English will be included, as language  
16 restriction has been shown not to bias the results of quantitative syntheses.<sup>18</sup> We anticipate that  
17 the language of publication will not be differential with regards to treatment outcomes, and so it  
18 is unlikely to bias our results. We will not place any restriction on publication year.  
19  
20  
21  
22  
23  
24  
25  
26  
27

### 28 **Study records**

29  
30 This systematic review will build upon the results of the previous Cochrane systematic review.<sup>17</sup>  
31  
32 The results of updated searches will be uploaded into Abstrackr  
33 (<http://abstrackr.cebm.brown.edu/>) for title and abstract screening.<sup>19</sup> Two independent  
34  
35 researchers will screen titles and abstracts of papers, eliminating those deemed irrelevant. A third  
36  
37 researcher will resolve discrepancies. Two independent researchers will read each potentially  
38  
39 relevant paper in full, selecting papers meeting specific inclusion criteria as above.  
40  
41  
42  
43  
44  
45  
46

47 Two researchers will independently extract data from each included trial, using the data  
48  
49 extraction form from the previous review.<sup>17</sup> The full list of data to be extracted has been  
50  
51 previously published. In brief, we will extract general characteristics of the publication, study  
52  
53  
54  
55  
56  
57  
58  
59  
60

1  
2  
3 date and setting, participant characteristics (age, sex, AD severity), inclusion and exclusion  
4  
5 criteria, descriptions of interventions, and outcomes data.  
6  
7  
8  
9

## 10 **Outcomes**

11  
12 The Harmonizing Outcome Measures for Eczema (HOME) initiative has identified clinician-  
13 reported signs, patient-reported symptoms, quality of life and long-term control as core domains  
14 for assessment in RCTs for AD.<sup>20</sup> HOME aims to identify individual outcome measures to be  
15 used in all RCTs and has selected the Eczema Area Severity Index (EASI) for signs<sup>21</sup> and Patient  
16 Oriented Eczema Measure (POEM) for symptoms.<sup>22</sup> No core instruments have been selected for  
17 quality of life and long-term control, and long-term control is generally not measured as a  
18 separate domain in most RCTs. Unfortunately, most RCTs for AD predate HOME, and as such  
19 outcome measures are not standardized across RCTs.<sup>4</sup> Therefore, we will extract data on all  
20 measures of signs, symptoms and quality of life.  
21  
22  
23  
24  
25  
26  
27  
28  
29  
30  
31  
32  
33  
34

35 The two most commonly used measures for clinical signs in AD RCTs are EASI and objective  
36 SCORAD (o-SCORAD) and they each have reasonable measurement properties.<sup>23 24</sup> As EASI  
37 was selected by HOME as the core outcome for clinical signs, it will be prioritized as the  
38 preferred outcome measure in our analysis. Similarly, the POEM scale will be used as the  
39 primary measure of AD symptoms. The most prominent symptoms of AD is itch, and separate  
40 measurement of change in itch severity will be extracted as a secondary outcome where  
41 available. The Dermatology Life Quality Index (DLQI) is the most commonly used instrument  
42 for quality of life in RCTs,<sup>25</sup> therefore, despite inadequate evidence for strong measurement  
43 properties, it will be prioritized in our analysis.<sup>25</sup>  
44  
45  
46  
47  
48  
49  
50  
51  
52  
53  
54  
55  
56  
57  
58  
59  
60

1  
2  
3  
4  
5 For each efficacy outcome, we will extract means and standard errors (SEs) for each study arm.  
6  
7 Where standard deviations (SD) or confidence intervals are reported, these will be transformed to  
8  
9 SEs. Authors of studies that do not report these outcomes as continuous variables or that do not  
10  
11 report SD/SE will be contacted for this information. Where SD/SE data are not available, the  
12  
13 mean value of known SDs will be imputed from the group of included studies.<sup>26</sup> For each safety  
14  
15 outcome, we will extract the sample size of each treatment and the number of patients  
16  
17 experiencing the event.  
18  
19  
20  
21  
22  
23

#### 24 **Data synthesis**

25  
26 Where possible, we intend to synthesize study data using NMAs. NMA is an extension of  
27  
28 pairwise meta-analysis which simultaneously combines both the direct evidence (i.e.,  
29  
30 interventions assessed head-to-head) and indirect evidence (i.e., interventions assessed through a  
31  
32 common comparator).<sup>27 28</sup> Doing so improves precision of treatment effect estimates and also  
33  
34 provides estimates for all pairwise comparisons including those missing from the direct  
35  
36 evidence.<sup>28 29</sup>  
37  
38  
39  
40  
41

42 For each outcome, NMA will be conducted when there are sufficiently similar studies forming a  
43  
44 network (i.e., the studies within the set share at least one common treatment). Within each  
45  
46 outcome domain (e.g., clinical signs), we plan to analyse each scale (e.g., EASI, o-SCORAD)  
47  
48 separately. In a separate analysis, we also plan to combine all scales within an outcome domain  
49  
50 using standardized mean differences.  
51  
52  
53  
54  
55  
56  
57  
58  
59  
60

1  
2  
3 NMA will be performed using a random-effects model within a Bayesian framework using the  
4  
5 *gemtc* R package.<sup>30</sup> For continuous outcomes (e.g., change in clinical signs), the NMA model  
6  
7 corresponds to a generalized linear model with identity link.<sup>31</sup> For binary outcomes (e.g., adverse  
8  
9 events), the NMA model corresponds to a generalized linear model with logit link.<sup>31</sup> We will  
10  
11 include random effects on the treatment parameters, which allows each study to have a different  
12  
13 but related treatment effect. The between-study variance (heterogeneity) will be assumed to be  
14  
15 constant for every treatment comparison. We will use non-informative prior distributions for all  
16  
17 model parameters. Convergence of 4 chains will be assessed by the Gelman-Rubin statistic and  
18  
19 visual inspection of trace plots.  
20  
21  
22  
23  
24  
25

26 Two key assumptions of NMA are transitivity and consistency. Transitivity relates to the validity  
27  
28 of estimating an unobserved direct comparison through the available indirect evidence. Although  
29  
30 transitivity cannot be tested statistically, its plausibility can be conceptually evaluated. The  
31  
32 restriction of our analysis to include only studies of moderate-severe AD makes our transitivity  
33  
34 assumption plausible. However, this will be evaluated further by examining the distribution of  
35  
36 other baseline factors that may influence treatment response, such as concomitant topical  
37  
38 therapy, duration of AD, baseline AD severity and age. Consistency extends the assumption of  
39  
40 transitivity to “loops” of evidence and relates to the agreement of the direct and indirect  
41  
42 estimates. For each analysis, we will empirically assess the consistency of the network by  
43  
44 comparing the direct and indirect evidence using a node-splitting approach<sup>32</sup>. This approach  
45  
46 estimates the direct and indirect treatment effect estimates separately. Discrepancies between  
47  
48 these estimates indicate inconsistency. If there is evidence of inconsistency, only the results of  
49  
50 the direct comparisons will be presented.  
51  
52  
53  
54  
55  
56  
57  
58  
59  
60

1  
2  
3  
4  
5 In addition to summary results presented as an odds ratio or mean with a 95% credible interval,  
6  
7 the cumulative rankings of treatments will also be presented. Cumulative ranking probability  
8  
9 plots represent the ranking probabilities of the various treatments with a visual estimation of their  
10  
11 uncertainty. Rankings will be quantified by the Surface Under the Cumulative Ranking  
12  
13 (SUCRA) that express the percentage (0–100%) of efficacy/safety each treatment has compared  
14  
15 with an ideal treatment ranked always first without uncertainty<sup>33</sup>. The larger the SUCRA value,  
16  
17 the better the rank.  
18  
19  
20  
21  
22  
23

#### 24 **Subgroup and sensitivity analyses**

25  
26 The robustness of the primary efficacy and safety estimates from the NMA will be evaluated by  
27  
28 analysing only outcomes with low risk of bias (as defined below). Outcome data on short-term  
29  
30 ( $\leq 16$  weeks) as well as long-term/maintenance ( $\geq 16$  weeks) treatment will be analysed  
31  
32 separately, as well as treatment efficacy & safety in children and adults, if adequate data are  
33  
34 available.  
35  
36  
37  
38  
39

#### 40 **Assessment of bias and strength of evidence**

41  
42 Two independent researchers will assess the risk of bias in individual studies using the Cochrane  
43  
44 Risk of Bias 2.0 tool.<sup>34</sup> To empirically assess for publication bias, we will compare the results of  
45  
46 our trial registry searches with the results from published studies. We will further assess for  
47  
48 reporting bias by comparing the outcomes pre-specified in the trial registries with the reported  
49  
50 outcomes. We will assess the overall quality of evidence for each outcome using the Grading of  
51  
52 Recommendations Assessment, Development and Evaluation (GRADE) criteria.<sup>35</sup>  
53  
54  
55  
56  
57  
58  
59  
60

## Updating

A recent study concluded that living network meta-analyses with continuous updating produce strong, timely evidence of comparative effectiveness.<sup>36</sup> The research questions in this systematic review are in line with proposed criteria for continuing a living systematic review, namely (1) the systematic review is a priority for decision making; (2) new information will change decision-making; and (3) there is likely to be, on an ongoing basis, new research relevant to decision making.<sup>37 38</sup> As such, if these criteria are still met at the conclusion of our baseline review and analysis, we will convert the review to a living systematic review with network meta-analysis. Given the number of new systemic medications in development for atopic dermatitis, this is likely to be the case.<sup>6</sup>

Updated searches will be conducted monthly, with relevant studies added to the review. The analysis will be updated every four months at a minimum, but will be updated more frequently if new studies meet any of the following three conditions:

1. Newly identified studies include outcomes data on a new systemic medication not currently included in the network meta-analysis;
2. Newly identified studies include comparisons between medications that have never before been directly compared; or
3. Results of newly identified studies are inconsistent with the results of the most recent network meta-analysis (e.g., if in the most recent network meta-analysis methotrexate is superior at improving symptoms compared with cyclosporine, but in a newly identified clinical trial cyclosporine is found to be superior).

## **Patient and public involvement**

Our research team includes atopic dermatitis patients, one of whom represents the Dutch Association for People with Atopic Dermatitis (VMCE), a patient advocacy group. They have contributed to the development of this protocol including the selection of outcomes of importance to patients. They will continue to contribute to the study going forward, ensuring that our results are presented in a way that is meaningful to patient decision making.

## **ETHICS AND DISSEMINATION**

There is no primary data collection involved in this study, and so research ethics approval is not required.

In this systematic review and network meta-analysis, we will provide the first comprehensive quantitative synthesis of systemic treatments for AD. We plan to disseminate our results through publication in a peer-reviewed scientific journal. We will report our results following the framework laid out in the PRISMA extension for NMA.<sup>39</sup> Ideally, in the future, new treatments for AD will be assessed against existing treatments in head-to-head RCTs. In the absence of those comparisons, our robust statistical approaches will provide comparative efficacy and safety data to aid decision making for clinicians and patients.

**Table 1.** Specific objectives (Participants, Interventions, Comparators, Outcomes, Design).

|                      |                                                                                                                                                                                                                                                                                                                                                                                                                                                                                                                                                                                                                          |
|----------------------|--------------------------------------------------------------------------------------------------------------------------------------------------------------------------------------------------------------------------------------------------------------------------------------------------------------------------------------------------------------------------------------------------------------------------------------------------------------------------------------------------------------------------------------------------------------------------------------------------------------------------|
| <b>Participants</b>  | Patients (children and adults) with moderate-to-severe atopic dermatitis                                                                                                                                                                                                                                                                                                                                                                                                                                                                                                                                                 |
| <b>Interventions</b> | Systemic immunomodulatory agents, including: <ul style="list-style-type: none"> <li>• Cyclosporine</li> <li>• Methotrexate</li> <li>• Azathioprine</li> <li>• Mycophenolate</li> <li>• Corticosteroids</li> <li>• Dupilumab</li> <li>• Nemolizumab</li> <li>• Lebrikizumab</li> <li>• Ustekinumab</li> <li>• Fezakinumab</li> <li>• Baricitinib</li> <li>• Apremilast</li> <li>• Interferon</li> <li>• Intravenous immunoglobulin</li> <li>• Others, including new agents whose first trials are published between publication of this protocol and our final literature search</li> </ul>                               |
| <b>Comparators</b>   | Any, including placebo                                                                                                                                                                                                                                                                                                                                                                                                                                                                                                                                                                                                   |
| <b>Outcomes</b>      | <p><i>Primary outcomes - Efficacy</i></p> <ol style="list-style-type: none"> <li>1. Change in investigator-reported clinical signs (e.g., EASI, o-SCORAD)</li> <li>2. Change in patient-reported symptoms (e.g., POEM)</li> </ol> <p><i>Primary outcomes - Safety</i></p> <ol style="list-style-type: none"> <li>3. Withdrawal from systemic treatment due to adverse events</li> <li>4. Occurrence of serious adverse events</li> </ol> <p><i>Secondary outcomes</i></p> <ol style="list-style-type: none"> <li>5. Change in health-related quality of life (e.g., DLQI)</li> <li>6. Change in itch severity</li> </ol> |
| <b>Design</b>        | Randomized controlled trials                                                                                                                                                                                                                                                                                                                                                                                                                                                                                                                                                                                             |

DLQI, Dermatology Life Quality Index; EASI, Eczema Area Severity Index; o-SCORAD, objective SCORAD; POEM, Patient Oriented Eczema Measure

## **AUTHOR CONTRIBUTIONS**

Dr. Drucker contributed to study design and drafted the protocol manuscript.

Dr. Flohr contributed to study design, drafted the PROSPERO protocol and provided critical revisions on the manuscript.

All other authors contributed to study design and provided critical revisions on the manuscript.

Drs. Spuls, Küster, Schmitt and Flohr are authors on a previous Cochrane systematic review on this topic.

## **FUNDING STATEMENT**

This research received no specific grant from any funding agency in the public, commercial or not-for-profit sectors.

## **COMPETING INTERESTS STATEMENT**

Aaron M Drucker: Departmental research funding from Sanofi and Regeneron and consultancy for Sanofi, RTI Health Solutions and Eczema Society of Canada as well as Astellas Canada, Prime Inc, Spire Learning and the Eczema Society of Canada.

Phyllis I Spuls: Principal investigator (PI) Methotrexate versus Azathioprine for severe Atopic Dermatitis (MAcAD) trial, PI of the Dutch national systemic therapy atopic eczema registry (TREAT NL) for adults and children. PS has served as a consultant to AbbVie, Anacor, Leo Pharma, Novartis and Sanofi, has received independent research grants (>4 years ago) from Leo Pharma and Schering-Plough, and has been involved in performing clinical trials with pharmaceutical industries that manufacture drugs used for the treatment of atopic dermatitis.

1  
2  
3 Jochen Schmitt: Department research funding from Sanofi, Pfizer, ALK, Novartis, and MSD. PI  
4  
5 of the German national AE registry (TREAT Germany).  
6

7  
8 Carsten Flohr: Chief Investigator (CI) of the TREATment of severe Atopic eczema in children  
9  
10 Trial (TREAT), a UK National Institute of Health Research funded multi-centre study comparing  
11  
12 methotrexate and Ciclosporin ([www.treat-trial.org.uk](http://www.treat-trial.org.uk)). CI of the UK national systemic therapy  
13  
14 atopic eczema registry (A\*STAR) for adults and children. Consultancy for Sanofi/Regeneron.  
15

16  
17 All other team members have no conflict of interest to declare.  
18  
19  
20  
21  
22  
23  
24  
25  
26  
27  
28  
29  
30  
31  
32  
33  
34  
35  
36  
37  
38  
39  
40  
41  
42  
43  
44  
45  
46  
47  
48  
49  
50  
51  
52  
53  
54  
55  
56  
57  
58  
59  
60

**REFERENCES**

1. Silverberg JI, Simpson EL. Associations of childhood eczema severity: a US population-based study. *Dermatitis : contact, atopic, occupational, drug* 2014;25(3):107-14. doi: 10.1097/DER.0000000000000034
2. Barbarot S, Auziere S, Gadkari A, et al. Epidemiology of atopic dermatitis in adults: results from an international survey. *Allergy* 2018 doi: 10.1111/all.13401
3. Sidbury R, Davis DM, Cohen DE, et al. Guidelines of care for the management of atopic dermatitis: section 3. Management and treatment with phototherapy and systemic agents. *Journal of the American Academy of Dermatology* 2014;71(2):327-49. doi: 10.1016/j.jaad.2014.03.030
4. Roekevisch E, Spuls PI, Kuester D, et al. Efficacy and safety of systemic treatments for moderate-to-severe atopic dermatitis: a systematic review. *The Journal of allergy and clinical immunology* 2014;133(2):429-38. doi: 10.1016/j.jaci.2013.07.049
5. Beck LA, Thaci D, Hamilton JD, et al. Dupilumab treatment in adults with moderate-to-severe atopic dermatitis. *The New England journal of medicine* 2014;371(2):130-9. doi: 10.1056/NEJMoa1314768
6. Paller AS, Kabashima K, Bieber T. Therapeutic pipeline for atopic dermatitis: End of the drought? *The Journal of allergy and clinical immunology* 2017;140(3):633-43. doi: 10.1016/j.jaci.2017.07.006
7. Blauvelt A, de Bruin-Weller M, Gooderham M, et al. Long-term management of moderate-to-severe atopic dermatitis with dupilumab and concomitant topical corticosteroids (LIBERTY AD CHRONOS): a 1-year, randomised, double-blinded, placebo-controlled, phase 3 trial. *Lancet* 2017;389(10086):2287-303. doi: 10.1016/S0140-6736(17)31191-1

- 1  
2  
3 8. Simpson EL, Bieber T, Guttman-Yassky E, et al. Two Phase 3 Trials of Dupilumab versus  
4  
5 Placebo in Atopic Dermatitis. *The New England journal of medicine* 2016 doi:  
6  
7 10.1056/NEJMoa1610020  
8  
9  
10 9. Thaci D, Simpson EL, Beck LA, et al. Efficacy and safety of dupilumab in adults with  
11  
12 moderate-to-severe atopic dermatitis inadequately controlled by topical treatments: a  
13  
14 randomised, placebo-controlled, dose-ranging phase 2b trial. *Lancet* 2015 doi:  
15  
16 10.1016/S0140-6736(15)00388-8  
17  
18  
19 10. Goujon C, Viguier M, Staumont-Salle D, et al. Methotrexate Versus Cyclosporine in Adults  
20  
21 with Moderate-to-Severe Atopic Dermatitis: A Phase III Randomized Noninferiority  
22  
23 Trial. *J Allergy Clin Immunol Pract* 2017 doi: 10.1016/j.jaip.2017.07.007  
24  
25  
26 11. Schram ME, Roekevisch E, Leeftang MM, et al. A randomized trial of methotrexate versus  
27  
28 azathioprine for severe atopic eczema. *The Journal of allergy and clinical immunology*  
29  
30 2011;128(2):353-9. doi: 10.1016/j.jaci.2011.03.024  
31  
32  
33 12. Guttman-Yassky E, Brunner PM, Neumann AU, et al. Efficacy and safety of fezakinumab  
34  
35 (an anti-IL-22 monoclonal antibody) in adults with moderate-to-severe atopic dermatitis  
36  
37 inadequately controlled by conventional treatments - A randomized, double-blind, phase  
38  
39 2a trial. *Journal of the American Academy of Dermatology* 2018 doi:  
40  
41 10.1016/j.jaad.2018.01.016  
42  
43  
44 13. Guttman-Yassky E, Silverberg JI, Nemoto O, et al. Baricitinib in adult patients with  
45  
46 moderate-to-severe atopic dermatitis: a phase 2 parallel, double-blinded, randomized  
47  
48 placebo-controlled multiple-dose study. *Journal of the American Academy of*  
49  
50 *Dermatology* 2018 doi: 10.1016/j.jaad.2018.01.018  
51  
52  
53  
54  
55  
56  
57  
58  
59  
60

- 1  
2  
3 14. Shamseer L, Moher D, Clarke M, et al. Preferred reporting items for systematic review and  
4  
5 meta-analysis protocols (PRISMA-P) 2015: elaboration and explanation. *Bmj*  
6  
7 2015;349:g7647. doi: 10.1136/bmj.g7647  
8  
9  
10 15. Chopra R, Vakharia PP, Sacotte R, et al. Severity strata for EASI, mEASI, oSCORAD,  
11  
12 SCORAD, ADSI and BSA in adolescents and adults with atopic dermatitis. *The British*  
13  
14 *journal of dermatology* 2017 doi: 10.1111/bjd.15641  
15  
16  
17 16. Leshem YA, Hajar T, Hanifin JM, et al. What the Eczema Area and Severity Index score  
18  
19 tells us about the severity of atopic dermatitis: an interpretability study. *The British*  
20  
21 *journal of dermatology* 2015;172(5):1353-7. doi: 10.1111/bjd.13662  
22  
23  
24 17. Küster D, Spuls PI, Flohr C, et al. Effects of systemic immunosuppressive therapies for  
25  
26 moderate-to-severe eczema in children and adults. *Cochrane Database of Systematic*  
27  
28 *Reviews* 2015(11) doi: 10.1002/14651858.CD011939  
29  
30  
31 18. Morrison A, Polisena J, Husereau D, et al. The effect of English-language restriction on  
32  
33 systematic review-based meta-analyses: a systematic review of empirical studies. *Int J*  
34  
35 *Technol Assess Health Care* 2012;28(2):138-44. doi: 10.1017/S0266462312000086  
36  
37  
38 19. Rathbone J, Hoffmann T, Glasziou P. Faster title and abstract screening? Evaluating  
39  
40 Abstrackr, a semi-automated online screening program for systematic reviewers. *Syst Rev*  
41  
42 2015;4:80. doi: 10.1186/s13643-015-0067-6  
43  
44  
45 20. Schmitt J, Apfelbacher C, Spuls PI, et al. The Harmonizing Outcome Measures for Eczema  
46  
47 (HOME) roadmap: a methodological framework to develop core sets of outcome  
48  
49 measurements in dermatology. *The Journal of investigative dermatology* 2015;135(1):24-  
50  
51 30. doi: 10.1038/jid.2014.320  
52  
53  
54  
55  
56  
57  
58  
59  
60

- 1  
2  
3 21. Schmitt J, Spuls PI, Thomas KS, et al. The Harmonising Outcome Measures for Eczema  
4  
5 (HOME) statement to assess clinical signs of atopic eczema in trials. *The Journal of*  
6  
7 *allergy and clinical immunology* 2014;134(4):800-7. doi: 10.1016/j.jaci.2014.07.043  
8  
9
- 10 22. Spuls PI, Gerbens LAA, Simpson E, et al. Patient-Oriented Eczema Measure (POEM), a core  
11  
12 instrument to measure symptoms in clinical trials: a Harmonising Outcome Measures for  
13  
14 Eczema (HOME) statement. *The British journal of dermatology* 2017;176(4):979-84. doi:  
15  
16 10.1111/bjd.15179  
17  
18
- 19 23. Rehal B, Armstrong AW. Health outcome measures in atopic dermatitis: a systematic review  
20  
21 of trends in disease severity and quality-of-life instruments 1985-2010. *PloS one*  
22  
23 2011;6(4):e17520. doi: 10.1371/journal.pone.0017520  
24  
25
- 26 24. Schmitt J, Langan S, Deckert S, et al. Assessment of clinical signs of atopic dermatitis: a  
27  
28 systematic review and recommendation. *The Journal of allergy and clinical immunology*  
29  
30 2013;132(6):1337-47. doi: 10.1016/j.jaci.2013.07.008  
31  
32
- 33 25. Heintz D, Chalmers J, Nankervis H, et al. Eczema Trials: Quality of Life Instruments Used  
34  
35 and Their Relation to Patient-reported Outcomes. A Systematic Review. *Acta Derm*  
36  
37 *Venereol* 2016;96(5):596-601. doi: 10.2340/00015555-2322  
38  
39
- 40 26. Furukawa TA, Barbui C, Cipriani A, et al. Imputing missing standard deviations in meta-  
41  
42 analyses can provide accurate results. *Journal of clinical epidemiology* 2006;59(1):7-10.  
43  
44 doi: 10.1016/j.jclinepi.2005.06.006  
45  
46
- 47 27. Caldwell DM, Ades AE, Higgins JP. Simultaneous comparison of multiple treatments:  
48  
49 combining direct and indirect evidence. *BMJ* 2005;331(7521):897-900. doi:  
50  
51 10.1136/bmj.331.7521.897 [published Online First: 2005/10/15]  
52  
53  
54  
55  
56  
57  
58  
59  
60

- 1  
2  
3 28. Lu G, Ades AE. Combination of direct and indirect evidence in mixed treatment  
4  
5 comparisons. *Stat Med* 2004;23(20):3105-24. doi: 10.1002/sim.1875  
6  
7  
8 29. Salanti G. Indirect and mixed-treatment comparison, network, or multiple-treatments meta-  
9  
10 analysis: many names, many benefits, many concerns for the next generation evidence  
11  
12 synthesis tool. *Res Synth Methods* 2012;3(2):80-97. doi: 10.1002/jrsm.1037 [published  
13  
14 Online First: 2012/06/01]  
15  
16  
17 30. Network Meta-Analysis Using Bayesian Methods. R package [program]. 0.8-2 version, 2016.  
18  
19  
20 31. Dias S, Welton NJ, Sutton AJ, et al. A Generalised Linear Modelling Framework for  
21  
22 Pairwise and Network Meta-Analysis of Randomised Controlled Trials. London 2014.  
23  
24 32. Dias S, Welton NJ, Caldwell DM, et al. Checking consistency in mixed treatment  
25  
26 comparison meta-analysis. *Stat Med* 2010;29(7-8):932-44. doi: 10.1002/sim.3767  
27  
28 [published Online First: 2010/03/10]  
29  
30  
31 33. Salanti G, Ades AE, Ioannidis JP. Graphical methods and numerical summaries for  
32  
33 presenting results from multiple-treatment meta-analysis: an overview and tutorial. *J Clin*  
34  
35 *Epidemiol* 2011;64(2):163-71. doi: 10.1016/j.jclinepi.2010.03.016  
36  
37  
38 34. Higgins JP, Altman DG, Gotzsche PC, et al. The Cochrane Collaboration's tool for assessing  
39  
40 risk of bias in randomised trials. *Bmj* 2011;343:d5928. doi: 10.1136/bmj.d5928  
41  
42  
43 35. Higgins J, Green S. Cochrane handbook for systematic reviews of interventions version 5.1.  
44  
45 0. The Cochrane Collaboration, 2011, 2013.  
46  
47 36. Nikolakopoulou A, Mavridis D, Furukawa TA, et al. Living network meta-analysis compared  
48  
49 with pairwise meta-analysis in comparative effectiveness research: empirical study. *Bmj*  
50  
51 2018;360:k585. doi: 10.1136/bmj.k585  
52  
53  
54  
55  
56  
57  
58  
59  
60

- 1  
2  
3 37. Elliott JH, Synnot A, Turner T, et al. Living systematic review: 1. Introduction-the why,  
4 what, when, and how. *Journal of clinical epidemiology* 2017 doi:  
5  
6 10.1016/j.jclinepi.2017.08.010  
7  
8  
9  
10 38. Synnot A, Turner T, Elliott J. Cochrane Living Systematic Reviews. Interim guidance for  
11 pilots., 2017.  
12  
13  
14 39. Hutton B, Salanti G, Caldwell DM, et al. The PRISMA extension statement for reporting of  
15 systematic reviews incorporating network meta-analyses of health care interventions:  
16 checklist and explanations. *Ann Intern Med* 2015;162(11):777-84. doi: 10.7326/M14-  
17  
18  
19  
20  
21  
22  
23  
24  
25  
26  
27  
28  
29  
30  
31  
32  
33  
34  
35  
36  
37  
38  
39  
40  
41  
42  
43  
44  
45  
46  
47  
48  
49  
50  
51  
52  
53  
54  
55  
56  
57  
58  
59  
60

**PRISMA-P (Preferred Reporting Items for Systematic review and Meta-Analysis Protocols) 2015 checklist: recommended items to address in a systematic review protocol\***

| Section and topic                 | Item No | Checklist item                                                                                                                                                                                                                |
|-----------------------------------|---------|-------------------------------------------------------------------------------------------------------------------------------------------------------------------------------------------------------------------------------|
| <b>ADMINISTRATIVE INFORMATION</b> |         |                                                                                                                                                                                                                               |
| Title:                            |         |                                                                                                                                                                                                                               |
| Identification                    | ✓ 1a    | Identify the report as a protocol of a systematic review                                                                                                                                                                      |
| Update                            | N/A 1b  | If the protocol is for an update of a previous systematic review, identify as such                                                                                                                                            |
| Registration                      | ✓ 2     | If registered, provide the name of the registry (such as PROSPERO) and registration number                                                                                                                                    |
| Authors:                          |         |                                                                                                                                                                                                                               |
| Contact                           | ✓ 3a    | Provide name, institutional affiliation, e-mail address of all protocol authors; provide physical mailing address of corresponding author <b>Email addresses for all authors provided in online submission</b>                |
| Contributions                     | ✓ 3b    | Describe contributions of protocol authors and identify the guarantor of the review                                                                                                                                           |
| Amendments                        | N/A 4   | If the protocol represents an amendment of a previously completed or published protocol, identify as such and list changes; otherwise, state plan for documenting important protocol amendments                               |
| Support:                          |         |                                                                                                                                                                                                                               |
| Sources                           | ✓ 5a    | Indicate sources of financial or other support for the review                                                                                                                                                                 |
| Sponsor                           | N/A 5b  | Provide name for the review funder and/or sponsor                                                                                                                                                                             |
| Role of sponsor or funder         | ✓ 5c    | Describe roles of funder(s), sponsor(s), and/or institution(s), if any, in developing the protocol                                                                                                                            |
| <b>INTRODUCTION</b>               |         |                                                                                                                                                                                                                               |
| Rationale                         | ✓ 6     | Describe the rationale for the review in the context of what is already known                                                                                                                                                 |
| Objectives                        | ✓ 7     | Provide an explicit statement of the question(s) the review will address with reference to participants, interventions, comparators, and outcomes (PICO)                                                                      |
| <b>METHODS</b>                    |         |                                                                                                                                                                                                                               |
| Eligibility criteria              | ✓ 8     | Specify the study characteristics (such as PICO, study design, setting, time frame) and report characteristics (such as years considered, language, publication status) to be used as criteria for eligibility for the review |
| Information sources               | ✓ 9     | Describe all intended information sources (such as electronic databases, contact with study authors, trial registers or other grey literature sources) with planned dates of coverage                                         |
| Search strategy                   | ✓ 10    | Present draft of search strategy to be used for at least one electronic database, including planned limits, such that it could be repeated <b>Reference given to recent Cochrane review</b>                                   |
| Study records:                    |         |                                                                                                                                                                                                                               |
| Data management                   | ✓ 11a   | Describe the mechanism(s) that will be used to manage records and data throughout the review                                                                                                                                  |

|    |                                    |       |                                                                                                                                                                                                                                                  |
|----|------------------------------------|-------|--------------------------------------------------------------------------------------------------------------------------------------------------------------------------------------------------------------------------------------------------|
| 1  |                                    |       |                                                                                                                                                                                                                                                  |
| 2  |                                    |       |                                                                                                                                                                                                                                                  |
| 3  | Selection process                  | ✓ 11b | State the process that will be used for selecting studies (such as two independent reviewers) through each phase of the review (that is, screening, eligibility and inclusion in meta-analysis)                                                  |
| 4  |                                    |       |                                                                                                                                                                                                                                                  |
| 5  | Data collection process            | 11c   | Describe planned method of extracting data from reports (such as piloting forms, done independently, in duplicate), any processes for obtaining and confirming data from investigators                                                           |
| 6  |                                    |       |                                                                                                                                                                                                                                                  |
| 7  | Data items                         | 12    | List and define all variables for which data will be sought (such as PICO items, funding sources), any pre-planned data assumptions and simplifications                                                                                          |
| 8  |                                    |       |                                                                                                                                                                                                                                                  |
| 9  | Outcomes and prioritization        | 13    | List and define all outcomes for which data will be sought, including prioritization of main and additional outcomes, with rationale                                                                                                             |
| 10 |                                    |       |                                                                                                                                                                                                                                                  |
| 11 | Risk of bias in individual studies | 14    | Describe anticipated methods for assessing risk of bias of individual studies, including whether this will be done at the outcome or study level, or both; state how this information will be used in data synthesis                             |
| 12 |                                    |       |                                                                                                                                                                                                                                                  |
| 13 | Data synthesis                     | 15a   | Describe criteria under which study data will be quantitatively synthesised                                                                                                                                                                      |
| 14 |                                    | ✓ 15b | If data are appropriate for quantitative synthesis, describe planned summary measures, methods of handling data and methods of combining data from studies, including any planned exploration of consistency (such as $I^2$ , Kendall's $\tau$ ) |
| 15 |                                    | ✓ 15c | Describe any proposed additional analyses (such as sensitivity or subgroup analyses, meta-regression)                                                                                                                                            |
| 16 |                                    | ✓ 15d | If quantitative synthesis is not appropriate, describe the type of summary planned                                                                                                                                                               |
| 17 |                                    |       |                                                                                                                                                                                                                                                  |
| 18 | Meta-bias(es)                      | ✓ 16  | Specify any planned assessment of meta-bias(es) (such as publication bias across studies, selective reporting within studies)                                                                                                                    |
| 19 |                                    |       |                                                                                                                                                                                                                                                  |
| 20 | Confidence in cumulative evidence  | ✓ 17  | Describe how the strength of the body of evidence will be assessed (such as GRADE)                                                                                                                                                               |
| 21 |                                    |       |                                                                                                                                                                                                                                                  |

22 **\* It is strongly recommended that this checklist be read in conjunction with the PRISMA-P Explanation and Elaboration (cite when available) for important**  
 23 **clarification on the items. Amendments to a review protocol should be tracked and dated. The copyright for PRISMA-P (including checklist) is held by the**  
 24 **PRISMA-P Group and is distributed under a Creative Commons Attribution Licence 4.0.**

25  
 26 *From: Shamseer L, Moher D, Clarke M, Ghersi D, Liberati A, Petticrew M, Shekelle P, Stewart L, PRISMA-P Group. Preferred reporting items for systematic review and*  
 27 *meta-analysis protocols (PRISMA-P) 2015: elaboration and explanation. BMJ. 2015 Jan 2;349(jan02 1):g7647.*

# BMJ Open

## Systemic immunomodulatory treatments for atopic dermatitis: protocol for a systematic review with network meta-analysis

|                                 |                                                                                                                                                                                                                                                                                                                                                                                                                                                                                                                                                                                                                                                                       |
|---------------------------------|-----------------------------------------------------------------------------------------------------------------------------------------------------------------------------------------------------------------------------------------------------------------------------------------------------------------------------------------------------------------------------------------------------------------------------------------------------------------------------------------------------------------------------------------------------------------------------------------------------------------------------------------------------------------------|
| Journal:                        | <i>BMJ Open</i>                                                                                                                                                                                                                                                                                                                                                                                                                                                                                                                                                                                                                                                       |
| Manuscript ID                   | bmjopen-2018-023061.R1                                                                                                                                                                                                                                                                                                                                                                                                                                                                                                                                                                                                                                                |
| Article Type:                   | Protocol                                                                                                                                                                                                                                                                                                                                                                                                                                                                                                                                                                                                                                                              |
| Date Submitted by the Author:   | 06-Jul-2018                                                                                                                                                                                                                                                                                                                                                                                                                                                                                                                                                                                                                                                           |
| Complete List of Authors:       | Drucker, Aaron; Women's College Hospital, Medicine<br>Ellis, Alexandra; Brown University School of Public Health<br>Jabbar-Lopez, Zarif; Guy's and St Thomas' NHS Foundation Trust, St John's Institute of Dermatology<br>Yiu, Zenas; Salford Royal NHS Foundation Trust<br>Arents, Bernd; Patients association for patients with AD (VMCE),<br>Burton, Tim<br>Spuls, Phyllis<br>Küster, Denise; Technische Universität Dresden Medizinische Fakultät Carl Gustav Carus, Center for Evidence-Based Healthcare<br>Schmitt, Jochen; Medical Faculty Carl Gustav Carus, Technical University Dresden, Department of Dermatology<br>Flohr, Carsten; King's College London |
| <b>Primary Subject Heading</b>: | Dermatology                                                                                                                                                                                                                                                                                                                                                                                                                                                                                                                                                                                                                                                           |
| Secondary Subject Heading:      | Evidence based practice                                                                                                                                                                                                                                                                                                                                                                                                                                                                                                                                                                                                                                               |
| Keywords:                       | DERMATOLOGY, Eczema < DERMATOLOGY, Adult dermatology < DERMATOLOGY, Paediatric dermatology < DERMATOLOGY                                                                                                                                                                                                                                                                                                                                                                                                                                                                                                                                                              |
|                                 |                                                                                                                                                                                                                                                                                                                                                                                                                                                                                                                                                                                                                                                                       |

SCHOLARONE™  
Manuscripts

1  
2  
3 **Systemic immunomodulatory treatments for atopic dermatitis: protocol for a systematic**  
4 **review with network meta-analysis**  
5

6 Aaron M Drucker<sup>1,2</sup>, Alexandra Ellis<sup>3</sup>, Zarif Jabbar-Lopez<sup>4</sup>, Zenas Z N Yiu<sup>5</sup>, Bernd WM  
7 Arents<sup>6</sup>, Tim Burton<sup>7</sup>, Phyllis I Spuls<sup>8</sup>, Denise Küster<sup>9</sup>, Jochen Schmitt<sup>9</sup>, Carsten Flohr<sup>4</sup>  
8  
9

- 10 1. Division of Dermatology, Department of Medicine, University of Toronto, Toronto, Canada  
11 2. Department of Medicine and Women's College Research Institute, Women's College  
12 Hospital, Toronto, Canada  
13 3. Brown University, Providence, Rhode Island, USA  
14 4. St John's Institute of Dermatology, Guy's and St Thomas' NHS Foundation Trust, London,  
15 UK  
16 5. Dermatology Centre, The University of Manchester, Salford Royal NHS Foundation Trust,  
17 Manchester, UK  
18 6. Dutch Association for People with Atopic Dermatitis (VMCE), Nijkerk, The Netherlands  
19 7. Patient Representative (independent), Nottingham, UK  
20 8. Department of Dermatology, Academic Medical Centre, University of Amsterdam,  
21 Amsterdam, The Netherlands  
22 9. Center for Evidence-Based Healthcare, Faculty of Medicine Carl Gustav Carus, Technische  
23 Universität (TU) Dresden, Germany  
24  
25  
26  
27  
28

29 **Corresponding author**

30 Aaron Drucker, MD, ScM, FRCPC  
31 Room 6401, Women's College Hospital  
32 76 Grenville Street  
33 Toronto, Ontario, Canada  
34 M5S 1B2  
35 Email: [aaron.drucker@wchospital.ca](mailto:aaron.drucker@wchospital.ca)  
36 Phone: 416-323-7546  
37  
38

39 **Word count:** 2,602  
40  
41  
42  
43  
44  
45  
46  
47  
48  
49  
50  
51  
52  
53  
54  
55  
56  
57  
58  
59  
60

## ABSTRACT

**Introduction:** There are numerous new systemic treatments for atopic dermatitis in various stages of development and most are being compared with placebo rather than active comparators.

In order to understand the relative efficacy and safety of existing and new treatments for atopic dermatitis, robust mixed comparisons (i.e., direct and indirect) would be beneficial. To address this gap, this protocol describes methods for a systematic review and network meta-analysis of systemic treatments for atopic dermatitis.

**Methods and analysis:** We will update the search of a previous systematic review, including searches of the Cochrane Central Register of Controlled Trials, MEDLINE, Embase, Latin American and Caribbean Health Science Information database and the Global Resource of Eczema Trials database in addition to clinical trial protocol registries. Title, abstract and full paper screening as well as data extraction will be conducted in duplicate by independent researchers. Primary outcomes include efficacy with regards to clinician-reported signs and patient-reported symptoms and safety with regards to withdrawal from treatment due to adverse events and the occurrence of serious adverse events. Secondary outcomes will include change in quality of life and itch severity. Where possible and appropriate, network meta-analysis will be performed for each outcome using a random-effects model within a Bayesian framework. If appropriate, the review will be transitioned to a living review with continuous updating of the analysis.

**Ethics and dissemination:** Dissemination in a peer-reviewed scientific journal is planned.

**PROSPERO registration number:** CRD42018088112.

**Keywords:** Atopic dermatitis, network meta-analysis, protocol, biologics, therapy

## STRENGTHS AND LIMITATIONS OF THIS STUDY

- We will conduct a thorough literature search to identify all relevant trials on the efficacy and safety of systemic treatments for atopic dermatitis, building on a recent Cochrane review that did not incorporate quantitative synthesis.
- The efficacy outcomes of interest represent three important domains, namely change in clinician-reported signs of disease, patient-reported symptoms and patient-reported quality of life.
- Network meta-analysis, if appropriate, will allow comparison of treatments that have not been compared head-to-head.
- Diverse outcome measurement instruments used to assess the three outcome domains and other differences in trial design may limit our ability to pool results from different studies.
- The study team includes patients, clinicians and methodologists.

## INTRODUCTION

Atopic dermatitis (AD) is a chronically relapsing inflammatory skin condition. For most patients, AD is mild and can be managed effectively with over-the-counter emollients and prescription topical therapies including corticosteroids. It is estimated that 7% of children and 2-8% of adults with AD have severe disease.<sup>1 2</sup> For these patients, topical therapies may be unsuccessful or inadequate and treatment with photo- or systemic therapy may be warranted.<sup>3</sup>

For years, systemic therapeutic options were limited to traditional immunosuppressive medications such as cyclosporine, methotrexate, azathioprine, mycophenolate and corticosteroids.<sup>4</sup> More recently, targeted agents have been developed including dupilumab, the first biologic approved for the treatment of moderate-to-severe AD.<sup>5</sup> Many other biologic and small-molecule treatments are currently being tested in clinical trials.<sup>6</sup>

Determining the relative efficacy and safety of the older and newer systemic therapies for AD is challenging. Most randomized controlled trials (RCTs) do not use standardized outcome measures and head-to-head comparison are rare.<sup>4 5 7-13</sup> Therefore, in order for clinicians and patients to understand how established and upcoming therapies compare with regards to efficacy and safety, indirect comparisons must be made. The aim of our study is to conduct a systematic review and network meta-analysis (NMA) to determine the relative efficacy and safety of systemic treatments for AD (Table 1). To date, no NMA has been conducted comparing systemic treatments for AD.

## METHODS AND ANALYSIS

This protocol has been written according to the Preferred Reporting Items for Systematic review and Meta-Analysis Protocols (PRISMA-P) guidance<sup>14</sup> and has been registered on Prospero ([http://www.crd.york.ac.uk/PROSPERO/display\\_record.php?ID=CRD42018088112](http://www.crd.york.ac.uk/PROSPERO/display_record.php?ID=CRD42018088112)). The research team consists of AD patients, clinicians and methodologists, all of whom have contributed to the design of this study. The specific research objectives are summarized in Table 1.

### Eligibility criteria

All RCTs of immunomodulatory systemic therapies for moderate-to-severe AD will be included in this review, without age and sex restriction. Due to the absence of an established definition of moderate-to-severe AD, RCTs will be eligible when including subjects defined as: "patients with moderate-to-severe AD", "patients with non-adequately controlled AD despite the use of topical anti-inflammatory therapy" or patients with moderate-to-severe AD according to published severity criteria.<sup>15 16</sup> We will summarize the inclusion criteria used for each study. All other study types and disease states will be excluded, including studies on other forms of eczema/dermatitis such as chronic hand dermatitis.

RCTs that compare systemic immunomodulatory therapies for AD with any comparator, including placebo, are eligible. Systemic immunomodulatory therapies include cyclosporine, methotrexate, azathioprine, mycophenolate, corticosteroids interferon-gamma, intravenous immunoglobulin, dupilumab and other novel systemic agents. We will include studies with systemic immunomodulatory therapies as monotherapy or in combination with topical therapies.

1  
2  
3 Medications used at different dosages will be treated as separately in the primary network meta-  
4 analysis. Studies investigating other systemic therapies, such as Chinese herbal remedies,  
5  
6 antihistamines, leukotriene antagonists, oral calcineurin inhibitors, vaccinations, phototherapy or  
7  
8  
9 antiviral/antibiotic agents will not be considered.  
10  
11  
12  
13

14  
15 In order to be included, RCTs must report sufficient data on at least one of the primary or  
16  
17 secondary outcomes listed in Table 1. Sufficient data include a point estimate and a measure of  
18  
19 variance (e.g., standard error, 95% confidence interval) for continuous outcomes and sample size  
20  
21 with number of patients experiencing an event for binary outcomes. We will examine these  
22  
23 endpoints for short-term ( $\leq 16$  weeks) and long term ( $> 16$  weeks) treatment.  
24  
25  
26  
27

### 28 **Information sources and search strategy**

29  
30  
31 Our searches will update those of a Cochrane review without quantitative synthesis authored by  
32  
33 members of our research team.<sup>17</sup> Electronic searches will be performed in the following  
34  
35 databases: Cochrane Central Register of Controlled Trials (CENTRAL); MEDLINE via Ovid  
36  
37 (from 1946); Embase via Ovid (from 1974); Latin American and Caribbean Health Science  
38  
39 Information database (LILACS) (from 1982); the Global Resource of Eczema Trials (GREAT)  
40  
41 database. Our search strategies for these databases will be modeled on the Medline strategy  
42  
43 originally developed for the previous Cochrane systematic review.<sup>17</sup> Searches will also be  
44  
45 performed in the following trials registers: the ISRCTN registry ([www.isrctn.com](http://www.isrctn.com));  
46  
47 ClinicalTrials.gov ([www.ClinicalTrials.gov](http://www.ClinicalTrials.gov)); the Australian New Zealand Clinical Trials  
48  
49 Registry ([www.anzctr.org.au](http://www.anzctr.org.au)); the World Health Organization International Clinical Trials  
50  
51 Registry Platform (ICTRP); the EU Clinical Trials Register ([www.clinicaltrialsregister.eu](http://www.clinicaltrialsregister.eu)).  
52  
53  
54  
55  
56  
57  
58  
59  
60

1  
2  
3  
4  
5 We will hand search reference lists of relevant publications that are retrieved as full papers as  
6 well as relevant systematic reviews and literature reviews to identify other eligible studies.  
7

8  
9 Experts in the field will be contacted for additional published and unpublished studies.  
10  
11

12  
13  
14 We will include data from published peer-reviewed journals, conference abstracts, trial registries  
15 and product monographs. Only studies published in English will be included, as language  
16 restriction has been shown not to bias the results of quantitative syntheses.<sup>18</sup> We anticipate that  
17 the language of publication will not be differential with regards to treatment outcomes, and so it  
18 is unlikely to bias our results. We will not place any restriction on publication year.  
19  
20  
21  
22  
23  
24  
25  
26  
27

### 28 **Study records**

29  
30 This systematic review will build upon the results of the previous Cochrane systematic review.<sup>17</sup>  
31

32  
33 The results of updated searches will be uploaded into Abstrackr

34  
35 (<http://abstrackr.cebm.brown.edu/>) for title and abstract screening.<sup>19</sup> Two independent  
36

37 researchers will screen titles and abstracts of papers, eliminating those deemed irrelevant. A third  
38 researcher will resolve discrepancies. Two independent researchers will read each potentially  
39 relevant paper in full, selecting papers meeting specific inclusion criteria as above.  
40  
41  
42  
43  
44

45  
46  
47 Two researchers will independently extract data from each included trial, using the data  
48 extraction form from the previous review.<sup>17</sup> The full list of data to be extracted has been  
49 previously published. In brief, we will extract general characteristics of the publication, study  
50 date and setting, participant characteristics (age, sex, AD severity), inclusion and exclusion  
51  
52  
53  
54  
55  
56  
57  
58  
59  
60

1  
2  
3 criteria, descriptions of interventions, and outcomes data. To our knowledge, trial reports of  
4 systemic therapy for AD have not included individual patient-level data. As such, data will be  
5 extracted at the trial arm level, rather than the individual patient level. If, in the future, individual  
6 patient data becomes more readily available for relevant trials, incorporating such individual  
7 patient data could improve the precision of the NMA.<sup>20</sup>  
8  
9  
10  
11  
12  
13

## 14 15 16 17 **Outcomes**

18  
19 The Harmonizing Outcome Measures for Eczema (HOME) initiative has identified clinician-  
20 reported signs, patient-reported symptoms, quality of life and long-term control as core domains  
21 for assessment in RCTs for AD.<sup>21</sup> HOME aims to identify individual outcome measures to be  
22 used in all RCTs and has selected the Eczema Area Severity Index (EASI) for signs<sup>22</sup> and Patient  
23 Oriented Eczema Measure (POEM) for symptoms.<sup>23</sup> No core instruments have been selected for  
24 quality of life and long-term control, and long-term control is generally not measured as a  
25 separate domain in most RCTs. Unfortunately, most RCTs for AD predate HOME, and as such  
26 outcome measures are not standardized across RCTs.<sup>4</sup> Therefore, we will extract data on all  
27 measures of signs, symptoms and quality of life.  
28  
29  
30  
31  
32  
33  
34  
35  
36  
37  
38  
39  
40  
41

42 The two most commonly used measures for clinical signs in AD RCTs are EASI and objective  
43 SCORAD (o-SCORAD) and they each have reasonable measurement properties.<sup>24 25</sup> As EASI  
44 was selected by HOME as the core outcome for clinical signs, it will be prioritized as the  
45 preferred outcome measure in our analysis. Similarly, the POEM scale will be used as the  
46 primary measure of AD symptoms. The most prominent symptoms of AD is itch, and separate  
47 measurement of change in itch severity will be extracted as a secondary outcome where  
48  
49  
50  
51  
52  
53  
54  
55  
56  
57  
58  
59  
60

1  
2  
3 available. The Dermatology Life Quality Index (DLQI) is the most commonly used instrument  
4  
5 for quality of life in RCTs,<sup>26</sup> therefore, despite inadequate evidence for strong measurement  
6  
7 properties, it will be prioritized in our analysis.<sup>26</sup>  
8  
9

10  
11  
12 For each efficacy outcome, we will extract means and standard errors (SEs) for each study arm.  
13  
14 Where standard deviations (SD) or confidence intervals are reported, these will be transformed to  
15  
16 SEs. Authors of studies that do not report these outcomes as continuous variables or that do not  
17  
18 report SD/SE will be contacted for this information. Where SD/SE data are not available, the  
19  
20 mean value of known SDs will be imputed from the group of included studies.<sup>27</sup>  
21  
22  
23

24  
25 The two included safety outcomes are withdrawal from treatment due to adverse events  
26  
27 (tolerability) and the occurrence of serious adverse events. For these outcomes we will rely on  
28  
29 reporting of these terms in the trial publications. Where adverse event rates in those specific  
30  
31 categories are not given in the report, we will contact the authors for that data. For each safety  
32  
33 outcome, we will extract the sample size of each treatment and the number of patients  
34  
35 experiencing the event.  
36  
37  
38  
39  
40  
41  
42  
43

#### 44 **Data synthesis**

45  
46 Where possible, we intend to synthesize study data using NMAs. NMA is an extension of  
47  
48 pairwise meta-analysis which simultaneously combines both the direct evidence (i.e.,  
49  
50 interventions assessed head-to-head) and indirect evidence (i.e., interventions assessed through a  
51  
52 common comparator).<sup>28 29</sup> Doing so improves precision of treatment effect estimates and also  
53  
54  
55  
56  
57  
58  
59  
60

1  
2  
3 provides estimates for all pairwise comparisons including those missing from the direct  
4  
5 evidence.<sup>29 30</sup>  
6  
7  
8  
9

10 For each outcome, NMA will be conducted when there are sufficiently similar studies forming a  
11 network (i.e., the studies within the set share at least one common treatment). Within each  
12 outcome domain (e.g., clinical signs), we plan to analyse each scale (e.g., EASI, o-SCORAD)  
13 separately. In a separate analysis, we also plan to combine all scales within an outcome domain  
14 using standardized mean differences.  
15  
16  
17  
18  
19  
20  
21  
22  
23

24 NMA will be performed using a random-effects model within a Bayesian framework using the  
25 *gemtc* R package.<sup>31</sup> For continuous outcomes (e.g., change in clinical signs), the NMA model  
26 corresponds to a generalized linear model with identity link.<sup>32</sup> For binary outcomes (e.g., adverse  
27 events), the NMA model corresponds to a generalized linear model with logit link.<sup>32</sup> We will  
28 include random effects on the treatment parameters, which allows each study to have a different  
29 but related treatment effect. The between-study variance (heterogeneity) will be assumed to be  
30 constant for every treatment comparison. We will use non-informative prior distributions for all  
31 model parameters. Convergence of 4 chains will be assessed by the Gelman-Rubin statistic and  
32 visual inspection of trace plots.  
33  
34  
35  
36  
37  
38  
39  
40  
41  
42  
43  
44  
45  
46

47 Two key assumptions of NMA are transitivity and consistency. Transitivity relates to the validity  
48 of estimating an unobserved direct comparison through the available indirect evidence. Although  
49 transitivity cannot be tested statistically, its plausibility can be conceptually evaluated. The  
50 restriction of our analysis to include only studies of moderate-severe AD makes our transitivity  
51  
52  
53  
54  
55  
56  
57  
58  
59  
60

1  
2  
3 assumption plausible. However, this will be evaluated further by examining the distribution of  
4  
5 other baseline factors that may influence treatment response, such as concomitant topical  
6  
7 therapy, duration of AD, baseline AD severity and age. Consistency extends the assumption of  
8  
9 transitivity to “loops” of evidence and relates to the agreement of the direct and indirect  
10  
11 estimates. For each analysis, we will empirically assess the consistency of the network by  
12  
13 comparing the direct and indirect evidence using a node-splitting approach.<sup>33</sup> This approach  
14  
15 estimates the direct and indirect treatment effect estimates separately. Discrepancies between  
16  
17 these estimates indicate inconsistency. If there is evidence of inconsistency, only the results of  
18  
19 the direct comparisons will be presented.  
20  
21  
22  
23  
24  
25

26 In addition to summary results presented as an odds ratio or mean with a 95% credible interval,  
27  
28 the cumulative rankings of treatments will also be presented. Cumulative ranking probability  
29  
30 plots represent the ranking probabilities of the various treatments with a visual estimation of their  
31  
32 uncertainty. Rankings will be quantified by the Surface Under the Cumulative Ranking  
33  
34 (SUCRA) that express the percentage (0–100%) of efficacy/safety each treatment has compared  
35  
36 with an ideal treatment ranked always first without uncertainty<sup>34</sup>. The larger the SUCRA value,  
37  
38 the better the rank.  
39  
40  
41  
42  
43  
44

### 45 **Subgroup and sensitivity analyses**

46  
47 The robustness of the primary efficacy and safety estimates from the NMA will be evaluated by  
48  
49 analysing only outcomes with low risk of bias (as defined below). Subgroup analyses will also be  
50  
51 conducted for children and adults. Outcome data on short-term ( $\leq 16$  weeks) as well as long-  
52  
53 term/maintenance ( $> 16$  weeks) treatment will be analysed separately. We chose this cut off as  
54  
55  
56  
57  
58  
59  
60

1  
2  
3 most trials of systemic treatments for AD are 12-16 weeks in length. While the HOME group has  
4 included long-term control as a core outcome domain for clinical trials, we will most likely not  
5  
6 be able to assess true long-term control in our analysis, as this is unfortunately rarely assessed in  
7  
8 clinical trials.<sup>21</sup>  
9  
10  
11  
12  
13

### 14 **Assessment of bias and strength of evidence**

15  
16  
17 Two independent researchers will assess the risk of bias in individual studies using the Cochrane  
18 Risk of Bias 2.0 tool.<sup>35</sup> To empirically assess for publication bias, we will compare the results of  
19 our trial registry searches with the results from published studies. We will further assess for  
20 reporting bias by comparing the outcomes pre-specified in the trial registries with the reported  
21 outcomes. We will assess the overall quality of evidence for each outcome using the Grading of  
22 Recommendations Assessment, Development and Evaluation (GRADE) criteria.<sup>36</sup>  
23  
24  
25  
26  
27  
28  
29  
30  
31  
32

### 33 **Updating**

34  
35 A recent study concluded that living network meta-analyses with continuous updating produce  
36 strong, timely evidence of comparative effectiveness.<sup>37</sup> The research questions in this systematic  
37 review are in line with proposed criteria for continuing a living systematic review, namely (1) the  
38 systematic review is a priority for decision making; (2) new information will change decision-  
39 making; and (3) there is likely to be, on an ongoing basis, new research relevant to decision  
40 making.<sup>38 39</sup> As such, if these criteria are still met at the conclusion of our baseline review and  
41 analysis, we will convert the review to a living systematic review with network meta-analysis.  
42 Given the number of new systemic medications in development for atopic dermatitis, this is  
43 likely to be the case.<sup>6</sup>  
44  
45  
46  
47  
48  
49  
50  
51  
52  
53  
54  
55  
56  
57  
58  
59  
60

1  
2  
3  
4  
5 Updated searches will be conducted monthly, with relevant studies added to the review. The  
6  
7 analysis will be updated every four months at a minimum, but will be updated more frequently if  
8  
9 new studies meet any of the following three conditions:

- 12 1. Newly identified studies include outcomes data on a new systemic medication not  
13 currently included in the network meta-analysis;
- 14 2. Newly identified studies include comparisons between medications that have never  
15 before been directly compared; or
- 16 3. Results of newly identified studies are inconsistent with the results of the most recent  
17 network meta-analysis (e.g., if in the most recent network meta-analysis methotrexate is  
18 superior at improving symptoms compared with cyclosporine, but in a newly identified  
19 clinical trial cyclosporine is found to be superior).

### 32 **Patient and public involvement**

33 Our research team includes atopic dermatitis patients, one of whom represents the Dutch  
34 Association for People with Atopic Dermatitis (VMCE), a patient advocacy group. They have  
35 contributed to the development of this protocol including the selection of outcomes of  
36 importance to patients. They will continue to contribute to the study going forward, ensuring that  
37 our results are presented in a way that is meaningful to patient decision making.  
38  
39  
40  
41  
42  
43  
44  
45  
46  
47  
48

### 49 **ETHICS AND DISSEMINATION**

50 There is no primary data collection involved in this study, and so research ethics approval is not  
51 required.  
52  
53  
54  
55  
56  
57  
58  
59  
60

1  
2  
3  
4  
5 We plan to disseminate our results through publication in a peer-reviewed scientific journal. We  
6 will report our results following the framework laid out in the PRISMA extension for NMA.<sup>40</sup>  
7  
8  
9

## 10 11 **SUMMARY**

12  
13 In this systematic review and network meta-analysis, we will provide the first comprehensive  
14 quantitative synthesis of systemic treatments for AD. As new systemic treatments are developed  
15 and tested clinically, with some eventually obtaining clinical approval, it will be essential to  
16 compare new and established treatments in rigorous manor. Ideally, new treatments for AD will  
17 be assessed against existing treatments in head-to-head RCTs. However, this is unlikely to be the  
18 case. Using psoriasis as an example, most new systemic agents are only compared with placebo,  
19 rather than an active comparator. Recent NMAs for psoriasis have provided a solution, giving  
20 patients, clinicians and other stakeholders a means of comparing relevant therapeutic options.<sup>41 42</sup>  
21  
22 NMA does have limitations in the setting of systemic therapies for AD, particularly differences  
23 in clinical trial design across included studies. Nevertheless, in the absence of head-to-head trial  
24 comparisons, the NMA approach provides comparative efficacy and safety data to aid decision  
25 making by clinicians and patients.  
26  
27  
28  
29  
30  
31  
32  
33  
34  
35  
36  
37  
38  
39  
40  
41  
42  
43  
44  
45  
46  
47  
48  
49  
50  
51  
52  
53  
54  
55  
56  
57  
58  
59  
60

**Table 1.** Specific objectives (Participants, Interventions, Comparators, Outcomes, Design).

|                      |                                                                                                                                                                                                                                                                                                                                                                                                                                                                                                                                                                                                                          |
|----------------------|--------------------------------------------------------------------------------------------------------------------------------------------------------------------------------------------------------------------------------------------------------------------------------------------------------------------------------------------------------------------------------------------------------------------------------------------------------------------------------------------------------------------------------------------------------------------------------------------------------------------------|
| <b>Participants</b>  | Patients (children and adults) with moderate-to-severe atopic dermatitis                                                                                                                                                                                                                                                                                                                                                                                                                                                                                                                                                 |
| <b>Interventions</b> | Systemic immunomodulatory agents, including: <ul style="list-style-type: none"> <li>• Cyclosporine</li> <li>• Methotrexate</li> <li>• Azathioprine</li> <li>• Mycophenolate</li> <li>• Corticosteroids</li> <li>• Dupilumab</li> <li>• Nemoizumab</li> <li>• Lebrikizumab</li> <li>• Ustekinumab</li> <li>• Fezakinumab</li> <li>• Baricitinib</li> <li>• Apremilast</li> <li>• Interferon</li> <li>• Intravenous immunoglobulin</li> <li>• Others, including new agents whose first trials are published between publication of this protocol and our final literature search</li> </ul>                                |
| <b>Comparators</b>   | Any, including placebo                                                                                                                                                                                                                                                                                                                                                                                                                                                                                                                                                                                                   |
| <b>Outcomes</b>      | <p><i>Primary outcomes - Efficacy</i></p> <ol style="list-style-type: none"> <li>1. Change in investigator-reported clinical signs (e.g., EASI, o-SCORAD)</li> <li>2. Change in patient-reported symptoms (e.g., POEM)</li> </ol> <p><i>Primary outcomes - Safety</i></p> <ol style="list-style-type: none"> <li>3. Withdrawal from systemic treatment due to adverse events</li> <li>4. Occurrence of serious adverse events</li> </ol> <p><i>Secondary outcomes</i></p> <ol style="list-style-type: none"> <li>5. Change in health-related quality of life (e.g., DLQI)</li> <li>6. Change in itch severity</li> </ol> |
| <b>Design</b>        | Randomized controlled trials                                                                                                                                                                                                                                                                                                                                                                                                                                                                                                                                                                                             |

DLQI, Dermatology Life Quality Index; EASI, Eczema Area Severity Index; o-SCORAD, objective SCORAD; POEM, Patient Oriented Eczema Measure

## AUTHOR CONTRIBUTIONS

Dr. Drucker contributed to study design and drafted the protocol manuscript.

Dr. Flohr contributed to study design, drafted the PROSPERO protocol and provided critical revisions on the manuscript.

Dr. Ellis, Dr. Jabbar-Lopez, Dr. Yiu, Mr. Arents, Mr. Burton, Dr. Spuls, Dr. Küster and Dr. Schmitt contributed to study design and provided critical revisions on the manuscript.

Drs. Spuls, Küster, Schmitt and Flohr are authors on a previous Cochrane systematic review on this topic.

As this is a protocol paper, the research has not yet been conducted and no data has been acquired or interpreted.

## FUNDING STATEMENT

This research received no specific grant from any funding agency in the public, commercial or not-for-profit sectors.

## COMPETING INTERESTS STATEMENT

Aaron M Drucker: Departmental research funding from Sanofi and Regeneron and consultancy for Sanofi, RTI Health Solutions and Eczema Society of Canada as well as Astellas Canada, Prime Inc, Spire Learning and the Eczema Society of Canada.

Phyllis I Spuls: Principal investigator (PI) Methotrexate versus Azathioprine for severe Atopic Dermatitis (MAcAD) trial, PI of the Dutch national systemic therapy atopic eczema registry (TREAT NL) for adults and children. PS has served as a consultant to AbbVie, Anacor, Leo Pharma, Novartis and Sanofi, has received independent research grants (>4 years ago) from Leo

1  
2  
3 Pharma and Schering-Plough, and has been involved in performing clinical trials with  
4 pharmaceutical industries that manufacture drugs used for the treatment of atopic dermatitis.  
5  
6  
7  
8  
9

10 Jochen Schmitt: Department research funding from Sanofi, Pfizer, ALK, Novartis, and MSD. PI  
11 of the German national AE registry (TREAT Germany).  
12  
13

14 Carsten Flohr: Chief Investigator (CI) of the TREATment of severe Atopic eczema in children  
15 Trial (TREAT), a UK National Institute of Health Research funded multi-centre study comparing  
16 methotrexate and Ciclosporin ([www.treat-trial.org.uk](http://www.treat-trial.org.uk)). CI of the UK national systemic therapy  
17 atopic eczema registry (A\*STAR) for adults and children. Consultancy for Sanofi/Regeneron.  
18  
19  
20  
21  
22

23 All other team members have no conflict of interest to declare.  
24  
25  
26  
27  
28  
29  
30  
31  
32  
33  
34  
35  
36  
37  
38  
39  
40  
41  
42  
43  
44  
45  
46  
47  
48  
49  
50  
51  
52  
53  
54  
55  
56  
57  
58  
59  
60

## REFERENCES

1. Silverberg JI, Simpson EL. Associations of childhood eczema severity: a US population-based study. *Dermatitis : contact, atopic, occupational, drug* 2014;25(3):107-14. doi: 10.1097/DER.0000000000000034
2. Barbarot S, Auziere S, Gadkari A, et al. Epidemiology of atopic dermatitis in adults: results from an international survey. *Allergy* 2018 doi: 10.1111/all.13401
3. Sidbury R, Davis DM, Cohen DE, et al. Guidelines of care for the management of atopic dermatitis: section 3. Management and treatment with phototherapy and systemic agents. *Journal of the American Academy of Dermatology* 2014;71(2):327-49. doi: 10.1016/j.jaad.2014.03.030
4. Roekevisch E, Spuls PI, Kuester D, et al. Efficacy and safety of systemic treatments for moderate-to-severe atopic dermatitis: a systematic review. *The Journal of allergy and clinical immunology* 2014;133(2):429-38. doi: 10.1016/j.jaci.2013.07.049
5. Beck LA, Thaci D, Hamilton JD, et al. Dupilumab treatment in adults with moderate-to-severe atopic dermatitis. *The New England journal of medicine* 2014;371(2):130-9. doi: 10.1056/NEJMoa1314768
6. Paller AS, Kabashima K, Bieber T. Therapeutic pipeline for atopic dermatitis: End of the drought? *The Journal of allergy and clinical immunology* 2017;140(3):633-43. doi: 10.1016/j.jaci.2017.07.006
7. Blauvelt A, de Bruin-Weller M, Gooderham M, et al. Long-term management of moderate-to-severe atopic dermatitis with dupilumab and concomitant topical corticosteroids (LIBERTY AD CHRONOS): a 1-year, randomised, double-blinded, placebo-controlled, phase 3 trial. *Lancet* 2017;389(10086):2287-303. doi: 10.1016/S0140-6736(17)31191-1

- 1  
2  
3 8. Simpson EL, Bieber T, Guttman-Yassky E, et al. Two Phase 3 Trials of Dupilumab versus  
4  
5 Placebo in Atopic Dermatitis. *The New England journal of medicine* 2016 doi:  
6  
7 10.1056/NEJMoa1610020  
8  
9
- 10 9. Thaci D, Simpson EL, Beck LA, et al. Efficacy and safety of dupilumab in adults with  
11  
12 moderate-to-severe atopic dermatitis inadequately controlled by topical treatments: a  
13  
14 randomised, placebo-controlled, dose-ranging phase 2b trial. *Lancet* 2015 doi:  
15  
16 10.1016/S0140-6736(15)00388-8  
17  
18
- 19 10. Goujon C, Viguier M, Staumont-Salle D, et al. Methotrexate Versus Cyclosporine in Adults  
20  
21 with Moderate-to-Severe Atopic Dermatitis: A Phase III Randomized Noninferiority  
22  
23 Trial. *J Allergy Clin Immunol Pract* 2017 doi: 10.1016/j.jaip.2017.07.007  
24  
25
- 26 11. Schram ME, Roekevisch E, Leeftang MM, et al. A randomized trial of methotrexate versus  
27  
28 azathioprine for severe atopic eczema. *The Journal of allergy and clinical immunology*  
29  
30 2011;128(2):353-9. doi: 10.1016/j.jaci.2011.03.024  
31  
32
- 33 12. Guttman-Yassky E, Brunner PM, Neumann AU, et al. Efficacy and safety of fezakinumab  
34  
35 (an anti-IL-22 monoclonal antibody) in adults with moderate-to-severe atopic dermatitis  
36  
37 inadequately controlled by conventional treatments - A randomized, double-blind, phase  
38  
39 2a trial. *Journal of the American Academy of Dermatology* 2018 doi:  
40  
41 10.1016/j.jaad.2018.01.016  
42  
43
- 44 13. Guttman-Yassky E, Silverberg JI, Nemoto O, et al. Baricitinib in adult patients with  
45  
46 moderate-to-severe atopic dermatitis: a phase 2 parallel, double-blinded, randomized  
47  
48 placebo-controlled multiple-dose study. *Journal of the American Academy of*  
49  
50 *Dermatology* 2018 doi: 10.1016/j.jaad.2018.01.018  
51  
52  
53  
54  
55  
56  
57  
58  
59

- 1  
2  
3 14. Shamseer L, Moher D, Clarke M, et al. Preferred reporting items for systematic review and  
4  
5 meta-analysis protocols (PRISMA-P) 2015: elaboration and explanation. *Bmj*  
6  
7 2015;349:g7647. doi: 10.1136/bmj.g7647  
8  
9
- 10 15. Chopra R, Vakharia PP, Sacotte R, et al. Severity strata for EASI, mEASI, oSCORAD,  
11  
12 SCORAD, ADSI and BSA in adolescents and adults with atopic dermatitis. *The British*  
13  
14 *journal of dermatology* 2017 doi: 10.1111/bjd.15641  
15  
16
- 17 16. Leshem YA, Hajar T, Hanifin JM, et al. What the Eczema Area and Severity Index score  
18  
19 tells us about the severity of atopic dermatitis: an interpretability study. *The British*  
20  
21 *journal of dermatology* 2015;172(5):1353-7. doi: 10.1111/bjd.13662  
22  
23
- 24 17. Küster D, Spuls PI, Flohr C, et al. Effects of systemic immunosuppressive therapies for  
25  
26 moderate-to-severe eczema in children and adults. *Cochrane Database of Systematic*  
27  
28 *Reviews* 2015(11) doi: 10.1002/14651858.CD011939  
29  
30
- 31 18. Morrison A, Polisena J, Husereau D, et al. The effect of English-language restriction on  
32  
33 systematic review-based meta-analyses: a systematic review of empirical studies. *Int J*  
34  
35 *Technol Assess Health Care* 2012;28(2):138-44. doi: 10.1017/S0266462312000086  
36  
37
- 38 19. Rathbone J, Hoffmann T, Glasziou P. Faster title and abstract screening? Evaluating  
39  
40 Abstrackr, a semi-automated online screening program for systematic reviewers. *Syst Rev*  
41  
42 2015;4:80. doi: 10.1186/s13643-015-0067-6  
43  
44
- 45 20. Leahy J, O'Leary A, Afdhal N, et al. The Impact of Individual Patient Data in a Network  
46  
47 Meta Analysis: An investigation into parameter estimation and model selection. *Res*  
48  
49 *Synth Methods* 2018 doi: 10.1002/jrsm.1305  
50  
51
- 52 21. Schmitt J, Apfelbacher C, Spuls PI, et al. The Harmonizing Outcome Measures for Eczema  
53  
54 (HOME) roadmap: a methodological framework to develop core sets of outcome  
55  
56  
57  
58  
59  
60

- 1  
2  
3 measurements in dermatology. *The Journal of investigative dermatology* 2015;135(1):24-  
4  
5 30. doi: 10.1038/jid.2014.320  
6  
7
- 8 22. Schmitt J, Spuls PI, Thomas KS, et al. The Harmonising Outcome Measures for Eczema  
9  
10 (HOME) statement to assess clinical signs of atopic eczema in trials. *The Journal of*  
11  
12 *allergy and clinical immunology* 2014;134(4):800-7. doi: 10.1016/j.jaci.2014.07.043  
13  
14
- 15 23. Spuls PI, Gerbens LAA, Simpson E, et al. Patient-Oriented Eczema Measure (POEM), a core  
16  
17 instrument to measure symptoms in clinical trials: a Harmonising Outcome Measures for  
18  
19 Eczema (HOME) statement. *The British journal of dermatology* 2017;176(4):979-84. doi:  
20  
21 10.1111/bjd.15179  
22  
23
- 24 24. Rehal B, Armstrong AW. Health outcome measures in atopic dermatitis: a systematic review  
25  
26 of trends in disease severity and quality-of-life instruments 1985-2010. *PloS one*  
27  
28 2011;6(4):e17520. doi: 10.1371/journal.pone.0017520  
29  
30
- 31 25. Schmitt J, Langan S, Deckert S, et al. Assessment of clinical signs of atopic dermatitis: a  
32  
33 systematic review and recommendation. *The Journal of allergy and clinical immunology*  
34  
35 2013;132(6):1337-47. doi: 10.1016/j.jaci.2013.07.008  
36  
37
- 38 26. Heintz D, Chalmers J, Nankervis H, et al. Eczema Trials: Quality of Life Instruments Used  
39  
40 and Their Relation to Patient-reported Outcomes. A Systematic Review. *Acta Derm*  
41  
42 *Venerol* 2016;96(5):596-601. doi: 10.2340/00015555-2322  
43  
44
- 45 27. Furukawa TA, Barbui C, Cipriani A, et al. Imputing missing standard deviations in meta-  
46  
47 analyses can provide accurate results. *Journal of clinical epidemiology* 2006;59(1):7-10.  
48  
49 doi: 10.1016/j.jclinepi.2005.06.006  
50  
51  
52  
53  
54  
55  
56  
57  
58  
59  
60

- 1  
2  
3 28. Caldwell DM, Ades AE, Higgins JP. Simultaneous comparison of multiple treatments:  
4  
5 combining direct and indirect evidence. *BMJ* 2005;331(7521):897-900. doi:  
6  
7 10.1136/bmj.331.7521.897 [published Online First: 2005/10/15]  
8  
9  
10 29. Lu G, Ades AE. Combination of direct and indirect evidence in mixed treatment  
11  
12 comparisons. *Stat Med* 2004;23(20):3105-24. doi: 10.1002/sim.1875  
13  
14  
15 30. Salanti G. Indirect and mixed-treatment comparison, network, or multiple-treatments meta-  
16  
17 analysis: many names, many benefits, many concerns for the next generation evidence  
18  
19 synthesis tool. *Res Synth Methods* 2012;3(2):80-97. doi: 10.1002/jrsm.1037 [published  
20  
21 Online First: 2012/06/01]  
22  
23  
24 31. Network Meta-Analysis Using Bayesian Methods. R package [program]. 0.8-2 version, 2016.  
25  
26  
27 32. Dias S, Welton NJ, Sutton AJ, et al. A Generalised Linear Modelling Framework for  
28  
29 Pairwise and Network Meta-Analysis of Randomised Controlled Trials. London 2014.  
30  
31 33. Dias S, Welton NJ, Caldwell DM, et al. Checking consistency in mixed treatment  
32  
33 comparison meta-analysis. *Stat Med* 2010;29(7-8):932-44. doi: 10.1002/sim.3767  
34  
35 [published Online First: 2010/03/10]  
36  
37  
38 34. Salanti G, Ades AE, Ioannidis JP. Graphical methods and numerical summaries for  
39  
40 presenting results from multiple-treatment meta-analysis: an overview and tutorial. *J Clin*  
41  
42 *Epidemiol* 2011;64(2):163-71. doi: 10.1016/j.jclinepi.2010.03.016  
43  
44  
45 35. Higgins JP, Altman DG, Gotzsche PC, et al. The Cochrane Collaboration's tool for assessing  
46  
47 risk of bias in randomised trials. *Bmj* 2011;343:d5928. doi: 10.1136/bmj.d5928  
48  
49  
50 36. Higgins J, Green S. Cochrane handbook for systematic reviews of interventions version 5.1.  
51  
52 0. The Cochrane Collaboration, 2011, 2013.  
53  
54  
55  
56  
57  
58  
59  
60

- 1  
2  
3 37. Nikolakopoulou A, Mavridis D, Furukawa TA, et al. Living network meta-analysis compared  
4  
5 with pairwise meta-analysis in comparative effectiveness research: empirical study. *Bmj*  
6  
7 2018;360:k585. doi: 10.1136/bmj.k585  
8  
9
- 10 38. Elliott JH, Synnot A, Turner T, et al. Living systematic review: 1. Introduction-the why,  
11  
12 what, when, and how. *Journal of clinical epidemiology* 2017 doi:  
13  
14 10.1016/j.jclinepi.2017.08.010  
15  
16
- 17 39. Synnot A, Turner T, Elliott J. Cochrane Living Systematic Reviews. Interim guidance for  
18  
19 pilots., 2017.  
20  
21
- 22 40. Hutton B, Salanti G, Caldwell DM, et al. The PRISMA extension statement for reporting of  
23  
24 systematic reviews incorporating network meta-analyses of health care interventions:  
25  
26 checklist and explanations. *Ann Intern Med* 2015;162(11):777-84. doi: 10.7326/M14-  
27  
28 2385  
29  
30
- 31 41. Sbidian E, Chaimani A, Garcia-Doval I, et al. Systemic pharmacological treatments for  
32  
33 chronic plaque psoriasis: a network meta-analysis. *Cochrane Database Syst Rev*  
34  
35 2017;12:CD011535. doi: 10.1002/14651858.CD011535.pub2  
36  
37
- 38 42. Jabbar-Lopez ZK, Yiu ZZN, Ward V, et al. Quantitative Evaluation of Biologic Therapy  
39  
40 Options for Psoriasis: A Systematic Review and Network Meta-Analysis. *The Journal of*  
41  
42 *investigative dermatology* 2017;137(8):1646-54. doi: 10.1016/j.jid.2017.04.009  
43  
44  
45  
46  
47  
48  
49  
50  
51  
52  
53  
54  
55  
56  
57  
58  
59  
60

**PRISMA-P (Preferred Reporting Items for Systematic review and Meta-Analysis Protocols) 2015 checklist: recommended items to address in a systematic review protocol\***

| Section and topic                 | Item No | Checklist item                                                                                                                                                                                                                |
|-----------------------------------|---------|-------------------------------------------------------------------------------------------------------------------------------------------------------------------------------------------------------------------------------|
| <b>ADMINISTRATIVE INFORMATION</b> |         |                                                                                                                                                                                                                               |
| Title:                            |         |                                                                                                                                                                                                                               |
| Identification                    | ✓ 1a    | Identify the report as a protocol of a systematic review                                                                                                                                                                      |
| Update                            | N/A 1b  | If the protocol is for an update of a previous systematic review, identify as such                                                                                                                                            |
| Registration                      | ✓ 2     | If registered, provide the name of the registry (such as PROSPERO) and registration number                                                                                                                                    |
| Authors:                          |         |                                                                                                                                                                                                                               |
| Contact                           | ✓ 3a    | Provide name, institutional affiliation, e-mail address of all protocol authors; provide physical mailing address of corresponding author <b>Email addresses for all authors provided in online submission</b>                |
| Contributions                     | ✓ 3b    | Describe contributions of protocol authors and identify the guarantor of the review                                                                                                                                           |
| Amendments                        | N/A 4   | If the protocol represents an amendment of a previously completed or published protocol, identify as such and list changes; otherwise, state plan for documenting important protocol amendments                               |
| Support:                          |         |                                                                                                                                                                                                                               |
| Sources                           | ✓ 5a    | Indicate sources of financial or other support for the review                                                                                                                                                                 |
| Sponsor                           | N/A 5b  | Provide name for the review funder and/or sponsor                                                                                                                                                                             |
| Role of sponsor or funder         | ✓ 5c    | Describe roles of funder(s), sponsor(s), and/or institution(s), if any, in developing the protocol                                                                                                                            |
| <b>INTRODUCTION</b>               |         |                                                                                                                                                                                                                               |
| Rationale                         | ✓ 6     | Describe the rationale for the review in the context of what is already known                                                                                                                                                 |
| Objectives                        | ✓ 7     | Provide an explicit statement of the question(s) the review will address with reference to participants, interventions, comparators, and outcomes (PICO)                                                                      |
| <b>METHODS</b>                    |         |                                                                                                                                                                                                                               |
| Eligibility criteria              | ✓ 8     | Specify the study characteristics (such as PICO, study design, setting, time frame) and report characteristics (such as years considered, language, publication status) to be used as criteria for eligibility for the review |
| Information sources               | ✓ 9     | Describe all intended information sources (such as electronic databases, contact with study authors, trial registers or other grey literature sources) with planned dates of coverage                                         |
| Search strategy                   | ✓ 10    | Present draft of search strategy to be used for at least one electronic database, including planned limits, such that it could be repeated <b>Reference given to recent Cochrane review</b>                                   |
| Study records:                    |         |                                                                                                                                                                                                                               |
| Data management                   | ✓ 11a   | Describe the mechanism(s) that will be used to manage records and data throughout the review                                                                                                                                  |

1  
2  
3  
4  
5  
6  
7  
8  
9  
10  
11  
12  
13  
14  
15  
16  
17  
18  
19  
20  
21  
22  
23  
24  
25  
26  
27  
28  
29  
30  
31  
32  
33  
34  
35  
36  
37  
38  
39  
40  
41  
42  
43  
44  
45  
46

|                                    |     |                                                                                                                                                                                                                                                  |
|------------------------------------|-----|--------------------------------------------------------------------------------------------------------------------------------------------------------------------------------------------------------------------------------------------------|
| Selection process                  | 11b | State the process that will be used for selecting studies (such as two independent reviewers) through each phase of the review (that is, screening, eligibility and inclusion in meta-analysis)                                                  |
| Data collection process            | 11c | Describe planned method of extracting data from reports (such as piloting forms, done independently, in duplicate), any processes for obtaining and confirming data from investigators                                                           |
| Data items                         | 12  | List and define all variables for which data will be sought (such as PICO items, funding sources), any pre-planned data assumptions and simplifications                                                                                          |
| Outcomes and prioritization        | 13  | List and define all outcomes for which data will be sought, including prioritization of main and additional outcomes, with rationale                                                                                                             |
| Risk of bias in individual studies | 14  | Describe anticipated methods for assessing risk of bias of individual studies, including whether this will be done at the outcome or study level, or both; state how this information will be used in data synthesis                             |
| Data synthesis                     | 15a | Describe criteria under which study data will be quantitatively synthesised                                                                                                                                                                      |
|                                    | 15b | If data are appropriate for quantitative synthesis, describe planned summary measures, methods of handling data and methods of combining data from studies, including any planned exploration of consistency (such as $I^2$ , Kendall's $\tau$ ) |
|                                    | 15c | Describe any proposed additional analyses (such as sensitivity or subgroup analyses, meta-regression)                                                                                                                                            |
|                                    | 15d | If quantitative synthesis is not appropriate, describe the type of summary planned                                                                                                                                                               |
| Meta-bias(es)                      | 16  | Specify any planned assessment of meta-bias(es) (such as publication bias across studies, selective reporting within studies)                                                                                                                    |
| Confidence in cumulative evidence  | 17  | Describe how the strength of the body of evidence will be assessed (such as GRADE)                                                                                                                                                               |

**\* It is strongly recommended that this checklist be read in conjunction with the PRISMA-P Explanation and Elaboration (cite when available) for important clarification on the items. Amendments to a review protocol should be tracked and dated. The copyright for PRISMA-P (including checklist) is held by the PRISMA-P Group and is distributed under a Creative Commons Attribution Licence 4.0.**

*From: Shamseer L, Moher D, Clarke M, Ghersi D, Liberati A, Petticrew M, Shekelle P, Stewart L, PRISMA-P Group. Preferred reporting items for systematic review and meta-analysis protocols (PRISMA-P) 2015: elaboration and explanation. BMJ. 2015 Jan 2;349(jan02 1):g7647.*
